# Supplementary material
Source: publisher figshare collection journal article supplement (https://aacr.figshare.com/articles/dataset/_/23668552)
Supplement: Supplementary file 1 [file 41536735]

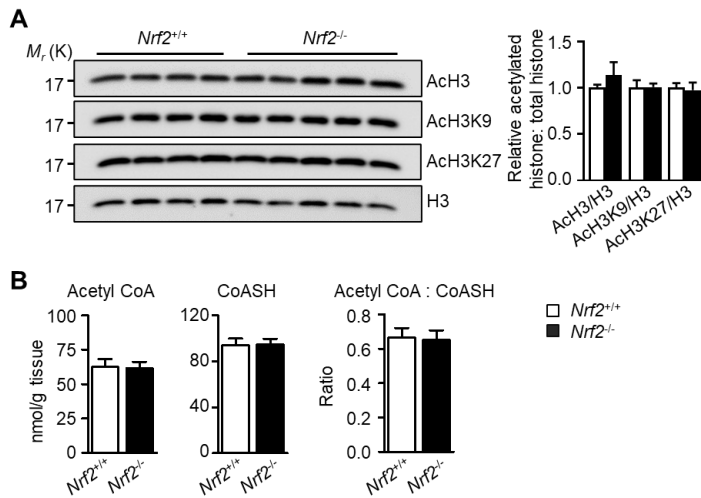

**Fig S2. Nrf2 ablation has no effect tumor adjacent liver tissues histone acetylation.** (A) Immunoblotting determined the levels of histone AcH3, AcH3K9 and AcH3K27 in the nuclear extracts of tumor adjacent normal liver tissues of *Nrf2*<sup>+/+</sup> and *Nrf2*<sup>-/-</sup> mice aged 36-week post-DEN treatment. Quantitation represents the ratio of acetylated histone to total histone H3. Data represent mean ± SD (n=4-5 mice each genotype). (B) Levels of acetyl-CoA, CoASH and ratio of acetyl-CoA:CoASH in tumor adjacent liver tissues of *Nrf2*<sup>+/+</sup> and *Nrf2*<sup>-/-</sup> mice. Data represent as mean ± SD (n=6 mice per group).
